# Supplementary material for: From Simulation to Sustainability: Using Forest Growth Models for Indicator-Based Bioeconomy Monitoring
Source: Research Square preprint supplement (doi:10.21203/rs.3.rs-7769112/v1), 2025-10-27
Supplement: Supplementary file 1 [file 937dbd86ead336678968ed9d.docx]

# Supplementary material

# S 1. Detailed description of indicators as discussed in expert panel

### S 1.1 Carbon

**Appropriate units for monitoring**

Units used to represent aboveground carbon vary among models depending on model type and research focus. Suitable indicators include carbon stocks, temporal changes in stocks (the first derivative of stocks), and fluxes between carbon pools, including exchanges with the atmosphere. Stocks are commonly expressed as biomass (dry matter, e.g., t/ha) or, less frequently, as direct carbon units (e.g., t C/ha). Although volume (m³) is widely applied in forest growth models, expert assessments concluded that it should not be used for carbon-related indicators because carbon content per unit volume varies with species- and pool-specific densities. Direct volume-based comparisons are therefore invalid without additional density information to convert volume into carbon mass. The expert panel recommended using carbon-based mass units such as t C/ha to ensure comparability across models. Alternatively, dry matter biomass may be applied given there is consensus on its carbon content.

Experts also noted potential unit inconsistencies between the groups "aboveground carbon" and "timber extraction," since the latter is usually expressed as volume. Because timber extraction is relevant both as a carbon flux and as a biomass flux of economic interest, cross-indicator unit consistency is necessary.

**Representation of indicators within the indicator group**

A key limitation of this indicator group is its predominant focus on woody biomass—such as woody stocks and harvested wood products—in most forest growth models. From an economic standpoint, this wood-centered approach is understandable. However, a comprehensive carbon-centered perspective requires inclusion of all aboveground biomass pools, including woody and non-woody biomass, to enable robust environmental impact assessment and greenhouse gas (GHG) accounting. Ideally, indicators should encompass stems, branches, bark, leaves (if fluxes are estimated), and deadwood.

Deadwood representation poses challenges due to variability across models. Some models omit it entirely, whereas others explicitly simulate standing and lying deadwood or convert moribund wood directly into litter or soil carbon without intermediate deadwood pools. Area reference units for deadwood also differ. Similarly, the treatment of timber extraction residues varies: they may be directed into deadwood pools, transferred to litter, or immediately converted to soil organic matter.

While carbon stocks of the primary forest stand are reasonably well represented, smaller secondary pools such as understory vegetation, ground vegetation layers, and young growth are often missing or insufficiently represented. Surface litter also remains untracked in some models. Beyond carbon accounting, omission of these small pools can bias estimates of water demand and competition. Experts highlighted that while such pools may contribute little to overall stock estimates if assumed to be in a steady state, their dynamic nature can significantly influence fluxes under certain conditions, for example following stand establishment or disturbance. This raises the question of whether treating untracked pools as implicitly stable provides an adequate approximation, particularly in the context of GHG inventory alignment.

**Appropriate indicator resolutions**

Forest growth models often simulate stocks and fluxes at very fine resolutions (e.g., individual trees or stands), which is generally inappropriate for regional or national monitoring. Aggregation of results is therefore essential. Harmonization among models was emphasized by experts, particularly concerning the lower diameter at breast height (DBH) threshold at which ingrowing trees are tracked. This threshold varies (e.g., 7 cm, 10 cm, 12 cm) and affects carbon stocks that remain untracked below the ingrowth limit. If harmonization is not achievable, models should explicitly report their DBH threshold. Additional data sources such as National Forest Inventory datasets may be required to estimate carbon stored in trees below this threshold.

Experts stressed the importance of distinguishing between carbon stocks, stock changes, and fluxes. Although small pools may contribute disproportionately to fluxes, net changes in stocks—which integrate growth, mortality, and extraction—are ultimately more informative for assessing whether forests act as carbon sinks or sources.

Temporal resolution differs widely between models, ranging from sub-daily in process-based models to multi-annual in empirical models. Some empirical models calculate annually but report over longer cycles (inventory or planning periods). Experts agreed that annual resolution is most appropriate for monitoring. However, models with coarser resolution should not be categorically excluded from bioeconomy monitoring if they provide consistent results.

**Limitations and overlap with other indicator groups**

Overall, experts considered the indicator group suitable for monitoring the impacts of the forest-based bioeconomy on carbon storage in German forests. It overlaps with the objectives of national GHG inventory reporting and can support assessments of bioeconomy effects on the national carbon balance. However, shortcomings remain. Disturbances can only be simulated as stochastic events, and their interactions with management interventions remain difficult to capture.

This group also overlaps with other indicator groups. Links exist with soil and soil carbon (via transfers of moribund material from aboveground pools), with timber extraction (due to units and flux representation), and indirectly with biodiversity indicators, since forest management affects both species composition and carbon storage.

### S 1.2 Wood extraction

Wood extraction refers to the removal of woody biomass through forest management practices such as thinning and targeted harvesting to meet market demands. This indicator group is closely linked to economic aspects of bioeconomy monitoring but also reflects ecological impacts of management activities. Most forest growth models with management routines simulate woody biomass removal through thinning operations and final harvests. Timber extraction is typically tracked by assortment classes, often differentiated by stem diameter and, in some cases, species or species groups. Proposed monitoring indicators within this group include extraction volumes by diameter class, subdivided by species (or at least by broadleaf vs. needleleaf groups).

**Units of measurement**

Experts identified mass (e.g., t/ha) and volume (e.g., m³/ha) as plausible units. Although some models quantify extraction in biomass units (dry mass), which can be converted to volume if species composition and wood densities are known, volume was considered the more appropriate monitoring unit. Volume is the standard measure in forestry and official statistics, and unlike biomass it can be measured directly in the field. However, volume-based monitoring introduces a unit discrepancy relative to carbon tracking, which typically uses mass units. To reduce conversion uncertainties, experts recommended providing both volume and mass whenever possible, with model-specific densities documented or derivable from outputs. A critical distinction concerns whether reported volumes are measured “under bark” or “over bark.” While under-bark volume is widely applied in timber markets, greenhouse gas (GHG) reporting requires over-bark volume. Models differ in their treatment, with some reporting only over-bark values and others providing both. Therefore, the minimum reporting requirement should include an explicit statement on whether units are under or over bark. To maximize comparability, experts identified [m³ over bark] as the most suitable default unit, while ideally both types should be reported.

**Differentiation and classification**

At minimum, timber extraction indicators should differentiate between broadleaf and needleleaf types, with further subdivision by species or species groups if feasible. Differentiation by timber quality or assortment classes is also important. However, most models lack detailed representations of wood quality, typically distinguishing only categories such as stem wood, industrial wood, and residual wood. *Stem wood* generally includes timber used for solid products, whereas *Industrial wood* covers material used for pulp, paper, or chips, and smaller diameter classes less suitable for sawing. Because market demand determines final usage, the distinction between stem wood and industrial wood is somewhat arbitrary, and evolving market conditions render classifications dynamic and uncertain. Furthermore, assortment class definitions differ among forest growth models, complicating comparisons. To address this, experts emphasized differentiation by diameter classes as a more neutral, usage-independent basis that enables transparent cross-model comparisons. Additionally, separate reporting of thinning vs. final harvest, and of damage-related vs. regular harvesting (where models allow), was considered valuable by several experts.

**Temporal and spatial resolution**

Experts agreed that an annual resolution is most appropriate, since interannual variation in extraction substantially influences ecosystem dynamics and bioeconomy outcomes. This also aligns with the annual cycles used in GHG monitoring and reporting.

For spatial resolution, national-level coverage is required to quantify contributions of forests to natural resource availability and service provision under bioeconomy monitoring. While finer spatial detail may be of interest to industry actors, such applications lie outside the scope of indicator-based monitoring. Experts highlighted regional-level resolution as additionally useful, for example at the federal state level in Germany, where indicators could inform processes related to the LULUCF sink target under the Federal Climate Protection Act.

**Economic considerations**

Although the indicator group was deemed generally suitable for bioeconomy monitoring, the expert panel noted that most forest growth models have limited representation of the economic value of timber resources. Harvesting and extraction costs are also frequently omitted. Economic dimensions are generally addressed in downstream modeling routines, if at all. Nevertheless, several experts reported ongoing developments to integrate such parameters into their models.

### S 1.3 Biodiversity

Forest biodiversity encompasses species diversity, structural diversity, and functional diversity (e.g., Puumalainen 2001). FGMs represent these dimensions to varying extents and at different spatial scales—from plot and stand to landscape, regional, and national levels. Common biodiversity indicators represented in FGMs include tree species composition, tree size distribution (often stratified by species), canopy closure, stand basal area, functional diversity metrics, and deadwood characteristics. Deadwood may further be differentiated by species group, size class, decay class, and orientation (standing vs. lying).

**Structural diversity**

Structural diversity can be characterized by distributions of tree age or diameter. Because tree age is not always simulated by models and is less readily measurable in the field, diameter distribution is generally considered a preferable proxy. The Gini index has been proposed as a suitable indicator to capture the evenness of tree size distributions, distinguishing stands with wide versus narrow distributions (e.g., Bosela et al. 2023). Another possible measure is “granularity,” i.e., the heterogeneity of size-class distributions within a given spatial unit.

**Species composition**

Beyond tree species abundance, the proportion of deciduous versus coniferous trees within a stand serves as an important biodiversity indicator, relevant also for habitat quality. Measures of evenness in species distribution further characterize forest composition. Suggested units include the relative contribution of species to total basal area, stem volume, or tree numbers. Experts slightly favored basal area as a reference, as it is both ecologically meaningful and readily comparable to field data. Special attention is required for rare and threatened species, such as those listed under Natura 2000 ( EU 1992; 2010). However, these species are often underrepresented in FGMs due to limited data on their occurrence and growth parameters. Where sufficient data are available, experts recommended the use of discrete ranking indices to classify stands by their habitat value for such species.

**Stand density and gap structure**

Stand density – quantified by canopy closure, tree density, or basal area – indicates stand development stage and strongly influences understory composition and diversity through its control of light availability. Experts emphasized the usefulness of including indicators of gap size, structure, and distribution. However, no consensus was reached on a specific measure or metric.

**Functional diversity**

Functional diversity is closely associated with ecosystem stability and resilience, being driven by variation in plant traits. Traits are measurable properties of plants that reflect their functional roles and processes. Some vegetation models explicitly simulate dynamics based on traits, such as aDVGM (Scheiter und Higgins 2009), aDVGM2 (Scheiter et al. 2013), and LPJmL-FIT (Sakschewski et al. 2015). Commonly considered traits include specific leaf area (SLA), xylem vulnerability to cavitation (p50), wood density, root distribution, crown shape, leaf habit (evergreen vs. deciduous), and carbon allocation strategies. Trait-based approaches remain largely restricted to dynamic global vegetation models (DGVMs) and are typically absent from empirical FGMs. Nevertheless, because traits are species-specific (see TRY-database, Kattge et al. 2011; Kattge et al. 2020), trait diversity can be indirectly assessed using simulated species composition in conjunction with field observations and remote sensing data.

**Temporal and spatial resolution**

Experts considered lower temporal resolutions (annual or longer) appropriate for biodiversity indicators, since vegetation composition and structural patterns generally change slowly, except under major disturbance events. The appropriate spatial resolution depends strongly on the addressed biodiversity dimension (alpha-, beta-, or gamma-diversity) and on whether horizontal heterogeneity at the landscape scale is of interest. The choice of spatial focus – whether plot, catchment, landscape, regional, or national level – determines the relevant resolution. A recent review concluded that stand-level indicators are more suitable than landscape-level indicators, and that structural measures are more useful than compositional ones for forest management planning in Europe (Ćosović et al. 2020).

### S 1.4 Soil and soil carbon

**Static vs. dynamic soil characteristics**

Forest growth models (FGMs) differ considerably in how they represent soils, ranging from highly simplified to process-oriented approaches. Soil aspects can broadly be categorized into time-invariant parameters (static indicators) and temporally variable state variables (dynamic indicators). Static indicators include soil texture, porosity, field capacity, plant-available water-holding capacity, and saturated hydraulic conductivity. These parameters are essential input variables that characterize site conditions and allow stratification of simulation results for dynamic indicators under defined boundary conditions. Reporting static parameters alongside dynamic indicators is therefore recommended to facilitate inter-model comparability and to provide a comprehensive simulation protocol.

Dynamic soil-related state variables typically include carbon, nitrogen, and nutrient contents and fluxes, with less frequent consideration of soil pH and cation exchange capacity. Most FGMs account for soil carbon stocks and their changes, but nitrogen and other nutrients are generally represented only in process-based models with detailed soil dynamics, such as the L-DNDC model (Haas et al. 2013), which explicitly simulates soil nitrogen cycling, including nitrification and denitrification. In contrast, soil ecological indicators describing biotic soil health remain largely absent in current models, beyond the occasional inclusion of root biomass.

**Nitrogen and nutrient availability**

Experts agreed that nitrogen and nutrient availability are key determinants of site productivity. Among existing models, L-DNDC provides the most detailed coverage of soil N dynamics. A nitrogen-enabled version of FORMIND exists but is rarely applied. Certain LPJ-GUESS versions incorporate N and P cycling schemes, though these remain under testing for individual-based simulations. Nitrogen is also included in the 4C model. By contrast, empirical models vary: SILVA uses nutrient classes as site factors, while models such as FABio Forest and WEHAM lack explicit nutrient representation, instead relying on general site quality factors (“Bonität”) that integrate nutrient availability with other growth-relevant characteristics.

**Soil carbon schemes**

Soil carbon schemes also vary widely, ranging from simple turnover–decay formulations to process-based routines that account for environmental drivers such as temperature, water content, and pH. Empirical models like FABio Forest and process-based models such as FORMIND often apply relatively simple turnover–decay schemes to close the forest carbon balance, linking litter and deadwood inputs to soil carbon pools and modulating decomposition using temperature functions (e.g., Q10). Experts emphasized that parameterization of decomposition functions is challenging due to high parameter uncertainty.

**Greenhouse gas reporting requirements**

When used for climate-dependent scenarios, soil carbon turnover must be linked to environmental variables, at minimum soil temperature and moisture. For monitoring purposes, experts stressed that soil carbon representation in FGMs should conform to greenhouse gas (GHG) greenhouse gas reporting requirements. Detailed inventories require not only CO₂ but also non-CO₂ fluxes, such as N₂O from nitrification and denitrification. Currently, only models with explicit nitrogen cycles, such as L-DNDC (Molina-Herrera et al. 2017), can provide such estimates, typically at local or regional scales (e.g., simulations for Saxony with L-DNDC), though scaling up to national level is feasible. CH₄ emissions are relevant for forests growing on frequently water-saturated organic soils (peat), but such forest types are rare in Germany.

**Indicator units and resolution**

For soil carbon and nutrient indicators, experts proposed using t/ha for stocks and t/ha/yr for stock changes and fluxes. Because changes in soil C stocks are generally slow, annual resolution was deemed sufficient for monitoring of temporal trends. While simulated sub-pools (e.g., litterfall input, SOM decomposition) may exhibit shorter-term dynamics, reporting below annual resolution was considered unnecessary for monitoring purposes. although sub-annual reporting may be useful where individual fluxes are of specific interest.

**Soil indicator differentiation and boundary conditions**

Experts recommended reporting total soil carbon stocks and their changes as a minimum consensus for soil-related indicators, along with explicit specifications of boundary conditions required for integration and comparability among models (e.g., soil depth). Soil boundary assumptions are a critical determinant of model results, as soil depth, parameters, and climate forcing data strongly condition outputs. Listing these boundary conditions should therefore be mandatory to enable cross-model comparisons.

**Soil aspects not covered by FGMs**

Several soil-related aspects remain outside the scope of most FGMs. Soil compaction from heavy machinery use was identified as a missing aspect, although it can significantly affect soil aeration, infiltration, and decomposition. Implementation would require detailed soil-type specifications and feedback on soil processes. Similarly, soil biological health, including soil biodiversity and microbial activity, is not represented in current models. Chemical properties are at best marginally included (e.g., pH as static input parameter and C/N ratio). Cation exchange capacity is also rarely considered, but known to have considerable influence on nutrient retention, availability, and soil chemistry. Experts agreed on the importance of soil biological health but noted both its conceptual underdefinition and the lack of measurable indicators suitable for modeling.

**Challenges in soil representation – data uncertainty and model implications**

Experts emphasized that soil representation in FGMs remains challenging due to the limited quality of soil data available for model parameterization. In most cases, process routines in soil modules are more advanced than the data available for initialization. High spatial variability over short distances, combined with the lack of a national soil inventory at fine resolution, leads to considerable uncertainty. Germany lacks a standardized, publicly available soil carbon database: datasets from separate institutions (e.g., Thünen Institute, Jülich Research Center (see, e.g., UBA 2024)) show considerable discrepancies. The widely used national overview maps (“Bodenübersichtskarten”, e.g., in resolution 1:1,000,000, the so-called BÜK1.000) are polygon-based vector products with limited detail; more refined maps exist for selected states (e.g. BGR 2020; NUMIS - Das niedersächsische Umweltportal 2005, or LGRB 2021).

Soil depth remains the most uncertain parameter, as it is often estimated indirectly from soil type and vegetation cover. These database-related uncertainties propagate through models, compounding model-based simplifications of soil processes. Nonetheless, changes in total soil C stocks occur slowly, and models have been calibrated against site-scale flux data for decades, generally reproducing measured fluxes reliably. Therefore, while absolute estimates of total soil C stocks remain uncertain, modeled changes in stocks, especially when aggregated over larger areas, are considered comparatively robust.

### S 1.5 Water indicators in FGMs

**Importance and representation**

Water indicators are a critical component of forest-based bioeconomy monitoring (BE-monitoring). They overlap with other indicator groups because plants must extract water from soil and release it to the atmosphere via transpiration. Water availability thus influences ecosystem resilience, stability, biodiversity, and carbon storage (Bond et al. 2008). It is controlled by climatic and soil-related boundary conditions and directly affects tree growth, productivity, and mortality. Together with nutrient availability and other site factors, water balance influences species composition, forest structure, and community diversity. Conversely, forest composition and structure themselves shape local to regional hydrological balances.

FGMs represent water-related processes at highly variable levels of detail. Empirical models, often climate-independent, usually incorporate water in a generalized way, e.g., through water-related site quality factors. In contrast, process-based models can simulate hydrological processes explicitly, including soil water dynamics via water bucket or balance models, and water limitation effects on photosynthesis and carbon assimilation.

**Key parameters and variables**

For water balance assessments, it is useful to separate *static site parameters* from *dynamic state variables*. Static parameters include soil saturation water content, field capacity, saturated hydraulic conductivity, and plant-available water capacity. Dynamic variables encompass soil water content, matric potential, unsaturated hydraulic conductivity, plant water demand, and atmospheric vapor pressure deficit. Experts noted, however, that due to high short-term variability, dynamic state variables are generally less suitable for bioeconomy monitoring purposes.

**Drought stress indicators**

Drought stress has emerged as a major limiting factor for forest productivity in Germany and across Europe. Experts therefore considered the inclusion of drought stress indicators indispensable for bioeconomy monitoring. Several such indicators already exist in process-based vegetation models.

Climatological drought indicators, such as the Standardized Precipitation Evapotranspiration Index (SPEI; Vicente-Serrano et al. 2010), compare precipitation with potential evapotranspiration to estimate drought stress probability at monthly to annual time scales. While useful, purely climatological indicators neglect buffer effects from soils, groundwater, and hydrological conditions. To capture these effects, field-based or model-based site-level water balance data are required, for example, estimates of water-limited actual evapotranspiration (aET) compared to atmospheric water demand (pET).

**Factors influencing water deficit effects**

Recent findings highlight that stand density, species composition, and structure, together with soil properties, strongly modulate drought impacts (Weigel et al. 2023). Drought stress indicators quantify ecological impacts, but management can mitigate stress through silvicultural interventions. Stand density influences soil water availability, groundwater recharge, and extractable water per tree or per unit wood volume. Thinning reduces competition, improving water supply for remaining trees and lowering drought stress (Andrews et al. 2020; Navarro-Cerrillo et al. 2019; Toraño Caicoya und Pretzsch 2021)

However, thinning effects are complex: while moderate reductions in density alleviate stress, very low densities may alter microclimate and understory structure, with negative consequences for water balance. Root distribution also mediates vulnerability: deeper-reaching root systems confer drought resistance, but taller trees remain vulnerable due to longer xylem transport pathways, greater gravitational and frictional drag, and higher exposure to radiation and evaporative demand (McGregor et al. 2021).

Vulnerability is also scale-dependent, as denser stands suffer amplified drought-induced growth reductions (Weigel et al. 2023). Recent studies indicate that optimal stand density varies regionally and by forest type (Sterck et al. 2021; Zamora-Pereira et al. 2021).

Drought duration, frequency, and timing further shape effects (e.g., Gao et al. 2018). Prolonged moderate droughts often reduce productivity through stomatal closure and associated reduced carbon assimilation, while shorter, high-intensity droughts can induce xylem cavitation and embolism, causing structural tree damage (McDowell et al. 2022). However, most forest growth do not yet represent cavitation processes explicitly.

**Temporal considerations**

Drought duration alone is not an adequate indicator and should be coupled with measures of intensity. Seasonal timing is also critical: growing-season droughts have greater direct impacts on productivity than deficits outside the vegetation period (D'Orangeville et al. 2018 Noormets et al. 2008). Winter precipitation and groundwater recharge may buffer summer water deficits, but long-term shifts in mean climatic water balance, such as consistent summer drying trends, pose major risks (Weigel et al. 2023). As trees should be adapted to the growing conditions of their site, in particular changes in the prevailing mean water regime tend to be problematic, e.g., a decadal decrease in the climatic water balance of the summer vulnerability (Weigel et al. 2023).

**Future directions**

Experts recommended that climatological drought indicators be coupled with site-specific parameters and stand characteristics. For example, indicators could relate extractable soil water to stand basal area or stem density. At present, no integrated indicator combines soil parameters, stand density/structure, and climatic drought stress. Depending on monitoring objectives, appropriate temporal resolutions for water indicators fall between seasonal, annual, and decadal scales.

# S 2. Details on the review on FGMs

### S 2.1 Suitable FGMs

| FGM | Reference |
| --- | --- |
| 4C | <https://doi.org/10.5194/gmd-13-5311-2020>; <https://doi.org/10.1007/s13595-013-0306-8> |
| EFISCEN-space | <https://doi.org/10.18174/583568> |
| EFISCEN 4.1 | <http://www.efi.int/files/attachments/publications/efi_tr_99_2016_verkerk_et_al.pdf> |
| FABio-Forest | <https://coilink.org/20.500.12592/cgff2t>;  [www.oeko.de/fileadmin/oekodoc/WP-Referenzszenario-BioSINK.pdf](http://www.oeko.de/fileadmin/oekodoc/WP-Referenzszenario-BioSINK.pdf) |
| FORMIND | <https://doi.org/10.1016/j.ecolmodel.2024.110696> |
| FORMIT-M | <https://doi.org/10.1016/j.envsoft.2019.02.009> |
| LPJmL-FIT | <https://doi.org/10.1111/gcb.12870> |
| LPJ-GUESS | <https://doi.org/10.5194/gmd-14-6071-2021>; <https://doi.org/10.1111/j.1466-8238.2010.00613.x> |
| Thünen Matrixmodell | https://doi.org/10.3220/WP1639056992000 |
| WEHAM | <https://www.bundeswaldinventur.de/fileadmin/Projekte/2024/bundeswaldinventur/Downloads/BMEL_WEHAM2013-2052_Broschuere_RZ03_web.pdf> |
| LandscapeDNDC | <https://doi.org/10.1007/s10980-012-9772-x> |

### S 2.2 Currently unsuitable FGMs (employed in Germany, but presently lacking national-scale application)

| FGM | Reason for exclusion | Reference |
| --- | --- | --- |
| BALANCE (process-based; individual-based; distance-based) | No study found that covers all of Germany; stand-level model | <https://doi.org/10.1055/s-2002-25743>; <https://doi.org/10.1007/s00484-009-0298-0>; <https://doi.org/10.1007/s11104-017-3306-x> |
| BWinPro (statistical; individual-based; distance-based) | Stand level | [https://forst.brandenburg.de/lfb/de/ueber-uns/landeskompetenzzentrum-lfe/lfe-waldwachstumsimulator-bwinpro/#](https://forst.brandenburg.de/lfb/de/ueber-uns/landeskompetenzzentrum-lfe/lfe-waldwachstumsimulator-bwinpro/) |
| ForestSimulator (statistical; individual-based; distance-based) | No study found that covers all of Germany; stand-level | <https://www.nw-fva.de/veroeffentlichen/software/forestsimulator> |
| iLand | Typically used at landscape scale, potentially usable at national level | <https://doi.org/10.1016/j.ecolmodel.2024.110785> |
| SILVA | No study found that covers all of Germany | <https://doi.org/10.1016/S0378-1127(02)00047-6> |
| TreeGrOSS (statistical; individual-based; distance-based) | No study found that covers all of Germany | <https://www.nw-fva.de/veroeffentlichen/software/treegross> |
| WaldPlaner | No study found that covers all of Germany | <https://www.nw-fva.de/veroeffentlichen/software/waldplaner>; <https://dl.gi.de/items/1d43bafe-89e3-473e-a462-ef2dbce7865e>; <https://www.nw-fva.de/fileadmin/nwfva/publikationen/pdf/albert_2007_ein.pdf>; 10.17875/gup2012-258 |
| WebBetriebsPlaner | No study found that covers all of Germany | <https://opac.dbu.de/ab/DBU-Abschlussbericht-AZ-26515.pdf>; https://doi.org/10.17875/gup2012-258; <https://mediatum.ub.tum.de/doc/1276697/document.pdf> |

### S 2.3 FGMs currently not covering Germany

| FGM | Potential to cover Germany | Reference |
| --- | --- | --- |
| 3-PG3/3-PGmix | Switzerland; potentially adjustable to Germany | <https://doi.org/10.3188/szf.2020.0158>; <https://doi.org/10.1016/j.ecolmodel.2015.07.010> |
| 3WME | Austria; potentially adjustable to Germany | <http://dx.doi.org/10.13140/RG.2.2.27649.17767> |
| ANAFORE (process-based) | Belgium; potentially adjustable to Germany | <https://doi.org/10.1016/j.ecolmodel.2008.04.007> |
| AVVIRK2000 | Norway; adjustability to Germany uncertain | <https://doi.org/10.1080/028275800750172736> |
| BASFOR | Netherlands/Scottland; potentially adjustable to Germany | <https://doi.org/10.1007/s10584-010-9917-3> |
| BIOME-BGC | Potentially adjustable to Germany | [doi.org/10.1093/treephys/23.11.735](https://doi.org/10.1093/treephys/23.11.735) |
| CALDIS | Austria; potentially adjustable to Germany | <https://doi.org/10.3390/f13040565> |
| CASTANEA | France; potentially adjustable to Germany | <https://doi.org/10.1016/j.ecolmodel.2005.01.004> |
| CBM-CFS3 | Canada; adjustability to Germany unlikely | <https://natural-resources.canada.ca/climate-change/climate-change-impacts-forests/carbon-accounting/carbon-budget-model/13107>; <https://doi.org/10.1016/j.ecolmodel.2008.10.018> |
| CO2FIX V.2; CO2fix V3.1 | Netherlands; potentially adjustable to Germany | <https://doi.org/10.1016/S0304-3800(02)00419-2>; <https://edepot.wur.nl/43524> |
| EFIMOD 2 | Russia; potentially adjustable to Germany | <https://doi.org/10.1016/S0304-3800(03)00240-0> |
| EFM | Great Britain; potentially adjustable to Germany | <https://doi.org/10.1079/9781845931742.0342>; <https://doi.org/10.1371/journal.pone.0252911> |
| ETCAP | Adjustability uncertain / unlikely (developed for Turkey) | <https://doi.org/10.1016/j.foreco.2023.120974>; <https://www.pjoes.com/Modelling-and-Analyzing-Timber-Production-and-r-nCarbon-Sequestration-Values-of-Forest,88012,0,2.html> |
| FFMP | Sweden; adjustability to Germany uncertain | <https://core.ac.uk/download/pdf/11696272.pdf> |
| FinnFor (process-based) | Finnland; adjustability to Germany uncertain | <https://doi.org/10.1016/S0304-3800(96)00081-6> |
| ForClim | Switzerland; potentially adjustable to Germany | <https://doi.org/10.2307/2265700>; <https://doi.org/10.1111/j.1365-2664.2011.02014.x> |
| FORCYTE, FORECAST | Canada; adjustability to Germany unlikely | <https://doi.org/10.1016/S0304-3800(99)00138-6>; <https://doi.org/10.1016/S0378-1127(02)00303-1> |
| FORDRY | Ukraine; potentially adjustable to Germany | <https://doi.org/10.2478/ffp-2021-0019> |
| ForGEM, ForGEM-W | Netherlands; potentially adjustable to Germany | <https://doi.org/10.1016/j.ecolmodel.2008.05.004>; <https://doi.org/10.1093/forestry/cpn028>; |
| FORLAS | Poland; potentially adjustable to Germany | <https://www.cabidigitallibrary.org/doi/full/10.5555/20073297404> |
| FORSPACE | Netherlands; potentially adjustable to Germany | <https://doi.org/10.1016/j.foreco.2006.01.037> |
| FORUG | Belgium; potentially adjustable to Germany | <https://doi.org/10.1093/treephys/26.6.807>; <https://doi.org/10.1016/j.ecolmodel.2007.07.010> |
| FRAM | Bulgaria; adjustability to Germany unlikely | <https://doi.org/10.1007/978-3-319-56201-8_7> |
| FVS | USA; adjustability to Germany unlikely | <https://www.fs.usda.gov/fmsc/ftp/fvs/docs/gtr/EssentialFVS.pdf>;  <https://doi.org/10.1016/j.compag.2005.02.003>; <https://doi.org/10.1016/j.foreco.2010.07.013> |
| GAYA | Sweden; potentially adjustable to Germany | <https://doi.org/10.3390/f13060816> |
| G4M (GLOBIOM) | Austria; potentially adjustable to Germany | <https://doi.org/10.11628/ksppe.2016.19.6.549>; <https://iiasa.ac.at/models-tools-data/g4m> |
| GOTiLWA, GOTILWA+ | Spain; adjustability to Germany uncertain | <https://doi.org/10.1007/978-3-642-58618-7_12>; <https://doi.org/10.1007/978-1-4020-8343-3_5> |
| GRAECO | France; potentially adjustable to Germany | <https://theses.fr/1999PA112115>; <https://doi.org/10.1093/treephys/25.7.813> |
| Heureka | Sweden; adjustability to Germany uncertain | <http://www.forestdss.org/wiki/index.php?title=Heureka>; <https://doi.org/10.14214/sf.1013>; <http://mcfns.com/index.php/Journal/article/view/91>; <https://doi.org/10.3389/ffgc.2023.1163105> |
| HUGIN | Sweden; adjustability to Germany uncertain | <http://www.forestdss.org/wiki/index.php?title=Hugin>; |
| IBERO / SIMANFOR | Spain; adjustability to Germany uncertain | <https://doi.org/10.3390/f10030249>; <https://doi.org/10.3390/f10030249>; <https://www.simanfor.es/> |
| Icelandic-Simulator | Iceland; ??? | <https://doi.org/10.1007/978-3-319-56201-8_16> |
| Kupolis | Lithuania; adjustability to Germany uncertain | [https://balticforestry.lammc.lt/bf/PDF_Articles/2004-10[2]/72_82%20Petrauksas%20E%20&%20Kuliesis.pdf](https://balticforestry.lammc.lt/bf/PDF_Articles/2004-10%5b2%5d/72_82%20Petrauksas%20E%20&%20Kuliesis.pdf) |
| LandClim | Switzerland; potentially adjustable to Germany | <http://www.highendsolutions.eu/page/LandClim>; <https://doi.org/10.3188/szf.2020.0142>; <https://doi.org/10.1016/j.ecolmodel.2003.12.055> |
| MARGOT | France; potentially adjustable to Germany | <https://doi.org/10.1007/s13595-012-0196-1>; <https://doi.org/10.1111/nrm.12352> |
| MASSIMO 3 | Switzerland; potentially adjustable to Germany | <https://doi.org/10.3188/szf.2011.0300>; <https://doi.org/10.3390/f10020094>; <https://doi.org/10.1007/978-3-030-19293-8_17> |
| MELASIM | Finland; adjustability to Germany uncertain | <https://jukuri.luke.fi/bitstream/handle/10024/538149/luke-luobio_7_2017.pdf?sequence=6> |
| MGM (Mixedwood Growth Model) | Canada; adjustability to Germany unlikely | <https://mgm.ualberta.ca/>; <https://doi.org/10.3390/f4010001> |
| MOSES | Austria; potentially adjustable to Germany | <https://doi.org/10.1016/j.ecolmodel.2017.01.013>; <https://doi.org/10.1016/j.tfp.2023.100433> |
| MOTTI | Finland; adjustability to Germany uncertain | <https://doi.org/10.1016/j.foreco.2024.121783>; <http://urn.fi/URN:ISBN:978-951-40-2487-0>; <https://doi.org/10.1007/s10342-014-0860-0>; |
| XXX (name unknown) | Switzerland; potentially adjustable to Germany | <https://doi.org/10.1007/s10342-015-0934-7> |
| PICUS | Austria; potentially adjustable to Germany | <https://picus.boku.ac.at/doku.php>; <https://doi.org/10.1093/treephys/25.7.939>; <https://doi.org/10.1016/S0378-1127(00)00386-8> |
| PipeQual | Finland; adjustability to Germany uncertain | <https://doi.org/10.1139/x02-130>; <https://doi.org/10.1139/cjfr-2016-0236>; |
| PREBAS | Finland; potentially adjustable to Germany | <https://doi.org/10.1016/j.foreco.2019.02.041>; <https://doi.org/10.1111/gcb.14992>; <https://doi.org/10.1007/s13280-023-01899-0> |
| PROGNAUS | Austria; potentially adjustable to Germany | <https://doi.org/10.1007/3-540-31304-4_6>; |
| Q | Sweden; potentially adjustable to Germany | <https://doi.org/10.1016/j.foreco.2012.09.007>; <https://doi.org/10.1016/S0304-3800(99)00043-5>; |
| Remsoft Woodstock (FMDSS) | Global application; potentially adjustable to Germany | <https://remsoft.com/>; <http://www.forestdss.org/wiki/index.php?title=Woodstock>; <https://doi.org/10.3389/fevo.2020.00200> |
| SADfLOR (FMDSS) | Portugal; ??? | <https://doi.org/10.1007/978-94-017-0307-9_17>; <https://doi.org/10.3390/f9070438>; |
| SIBYLA | Slowakia; potentially adjustable to Germany | <http://cbks.cz/SbornikPolana07/pdf/Fabrika_01.pdf>; <https://doi.org/10.1016/j.foreco.2013.09.005>; |
| SiWaWa | Switzerland; potentially adjustable to Germany; stand-level | <https://siwawa.org/wiki/index.php?title=Hauptseite>; <https://www.bafu.admin.ch/dam/bafu/de/dokumente/wald-holz/fachinfo-daten/waldwachstums-simulationsmodellderneuengeneration.pdf>; <https://doi.org/10.1051/forest/2010009> |
| SORTIE-ND | USA; potentially adjustable to Germany | <http://www.sortie-nd.org/index.html>; <https://doi.org/10.15684/formath.11.1>; <https://doi.org/10.1007/s13595-021-01074-z>; <https://doi.org/10.1139/x11-078> |
| SIMFLOR / StandsSIM | Portugal; ??? | <https://www.simflor.online/>; <http://www.forestdss.org/wiki/index.php?title=SIMFLOR>; <http://dx.doi.org/10.5424/fs/2016252-08916>; |
| SwissStandSim | Switzerland; potentially adjustable to Germany | <https://doi.org/10.3188/szf.2020.0116>; [https://www.wsl.ch/fileadmin/user_upload/WSL/Mitarbeitende /zell/final_report.pdf](https://www.wsl.ch/fileadmin/user_upload/WSL/Mitarbeitende/zell/final_report.pdf); |
| T | Norway; adjustability to Germany uncertain | <https://doi.org/10.1080/02827580802050722> |
| THP | Czech Republic; potentially adjustable to Germany | <https://doi.org/10.1007/978-3-319-56201-8_9> |
| TreeMig | Switzerland; potentially adjustable to Germany | <https://doi.org/10.5194/gmd-8-3563-2015>; <https://doi.org/10.1016/j.ecolmodel.2005.11.046>; |
| WoodPaM | Switzerland; potentially adjustable to Germany | <https://doi.org/10.1016/j.ecolmodel.2008.05.013> |
| Yield-SAFE | Netherlands; potentially adjustable to Germany | <https://doi.org/10.1016/j.ecoleng.2006.09.017> |

**References**

Andrews, C. M.; D'Amato, A. W.; Fraver, S.; Palik, B.; Battaglia, M. A.; Bradford, J. B. (2020): Low stand density moderates growth declines during hot droughts in semi‐arid forests. In: Journal of Applied Ecology 57 (6), pp. 1089–1102. DOI: 10.1111/1365-2664.13615.

BGR - Bundesanstalt für Geowissenschaften und Rohstoffe (2020): Bodenübersichtskarte 1:200.000 (BÜK200) Bundesanstalt für Geowissenschaften und Rohstoffe (ed.). Online available at https://www.bgr.bund.de/DE/Themen/Boden/Projekte/Flaechen_Rauminformationen_Boden/BUEK200/BUEK200.html, last accessed on 30 Sep 2025.

Bond, B.; Meinzer, F. C.; Brooks, J. R. (2008): How Trees Influence the Hydrological Cycle in Forest Ecosystems. In: Wood, P. J.; Hannah, D. M. and Sadler, J. P. (ed.): Hydroecology and ecohydrology. Past, present and future. Repr. Chichester: Wiley, pp. 7–28.

Bosela, M.; Rubio-Cuadrado, Á.; Marcis, P.; Merganičová, K.; Fleischer, P.; Forrester, D. I.; Uhl, E.; Avdagić, A.; Bellan, M.; Bielak, K.; Bravo, F.; Coll, L.; Cseke, K. et al. (2023): Empirical and process-based models predict enhanced beech growth in European mountains under climate change scenarios: A multimodel approach. In: Science of The Total Environment 888, 164123. DOI: 10.1016/j.scitotenv.2023.164123.

Ćosović, M.; Bugalho, M.; Thom, D.; Borges, J. (2020): Stand Structural Characteristics Are the Most Practical Biodiversity Indicators for Forest Management Planning in Europe. In: Forests 11 (3), p. 343. DOI: 10.3390/f11030343.

D'Orangeville, L.; Maxwell, J.; Kneeshaw, D.; Pederson, N.; Duchesne, L.; Logan, T.; Houle, D.; Arseneault, D.; Beier, C. M.; Bishop, D. A.; Druckenbrod, D.; Fraver, S.; Girard, F. et al. (2018): Drought timing and local climate determine the sensitivity of eastern temperate forests to drought. In: Global change biology 24 (6), pp. 2339–2351. DOI: 10.1111/gcb.14096.

EU - European Parliament and Council of the European Union (1992): Council Directive (EU) 92/43/EEC of 21 May 1992 on the conservation of natural habitats and of wild fauna. In: Official Journal L 206, pp. 7–50. Online available at http://data.europa.eu/eli/dir/1992/43/oj, last accessed on 30 Sep 2025.

EU - European Parliament and Council of the European Union (2010): Directive (EU) 2009/147/EC of the European Parliament and of the Council of 30 November 2009 on the conservation of wild birds. In: Official Journal of the European Union L 206, pp. 7–25. Online available at https://eur-lex.europa.eu/legal-content/EN/TXT/?uri=CELEX%3A32009L0147, last accessed on 30 Sep 2025.

Gao, S.; Liu, R.; Zhou, T.; Fang, W.; Yi, C.; Lu, R.; Zhao, X.; Luo, H. (2018): Dynamic responses of tree-ring growth to multiple dimensions of drought. In: Global Change Biology 24 (11), pp. 5380–5390. DOI: 10.1111/gcb.14367.

Haas, E.; Klatt, S.; Fröhlich, A.; Kraft, P.; Werner, C.; Kiese, R.; Grote, R.; Breuer, L.; Butterbach-Bahl, K. (2013): LandscapeDNDC: a process model for simulation of biosphere–atmosphere–hydrosphere exchange processes at site and regional scale. In: Landscape Ecology 28 (4), pp. 615–636. DOI: 10.1007/s10980-012-9772-x.

Kattge, J.; Bönisch, G.; Díaz, S.; Lavorel, S.; Prentice, I. C.; Leadley, P.; Tautenhahn, S.; Werner, G. D. A.; Aakala, T.; Abedi, M.; Acosta, A. T. R.; Adamidis, G. C.; Adamson, K. et al. (2020): TRY plant trait database - enhanced coverage and open access. In: Global Change Biology 26 (1), pp. 119–188. DOI: 10.1111/gcb.14904.

Kattge, J.; Díaz, S.; Lavorel, S.; Prentice, I. C.; Leadley, P.; Bönisch, G.; Garnier, E.; Westoby, M.; Reich, P. B.; Wright, I. J.; Cornelissen, J. H. C.; Violle, C.; Harrison, S. P. et al. (2011): TRY – a global database of plant traits. In: Global Change Biology 17 (9), pp. 2905–2935. DOI: 10.1111/j.1365-2486.2011.02451.x.

LGRB - Regierungspräsidium Freiburg, Landesamt für Geologie, Rohstoffe und Bergbau (2021): LGRB-Kartenviewer Regierungspräsidium Freiburg, Landesamt für Geologie, Rohstoffe und Bergbau (ed.). Online available at https://maps.lgrb-bw.de/, last accessed on 30 Sep 2025.

McDowell, N. G.; Sapes, G.; Pivovaroff, A.; Adams, H. D.; Allen, C. D.; Anderegg, W. R. L.; Arend, M.; Breshears, D. D.; Brodribb, T.; Choat, B.; Cochard, H.; Cáceres, M. de; de Kauwe, M. G. et al. (2022): Mechanisms of woody-plant mortality under rising drought, CO2 and vapour pressure deficit. In: Nature Reviews Earth & Environment 3 (5), pp. 294–308. DOI: 10.1038/s43017-022-00272-1.

McGregor, I. R.; Helcoski, R.; Kunert, N.; Tepley, A. J.; Gonzalez-Akre, E. B.; Herrmann, V.; Zailaa, J.; Stovall, A. E. L.; Bourg, N. A.; McShea, W. J.; Pederson, N.; Sack, L.; Anderson-Teixeira, K. J. (2021): Tree height and leaf drought tolerance traits shape growth responses across droughts in a temperate broadleaf forest. In: The New Phytologist 231 (2), pp. 601–616. DOI: 10.1111/nph.16996.

Molina-Herrera, S.; Haas, E.; Grote, R.; Kiese, R.; Klatt, S.; Kraus, D.; Kampffmeyer, T.; Friedrich, R.; Andreae, H.; Loubet, B.; Ammann, C.; Horváth, L.; Larsen, K. et al. (2017): Importance of soil NO emissions for the total atmospheric NOx budget of Saxony, Germany. In: Atmospheric Environment 152, pp. 61–76. DOI: 10.1016/j.atmosenv.2016.12.022.

Navarro-Cerrillo, R. M.; Sánchez-Salguero, R.; Rodriguez, C.; Duque Lazo, J.; Moreno-Rojas, J. M.; Palacios-Rodriguez, G.; Camarero, J. J. (2019): Is thinning an alternative when trees could die in response to drought? The case of planted Pinus nigra and P. sylvestris stands in southern Spain. In: Forest Ecology and Management 433, pp. 313–324. DOI: 10.1016/j.foreco.2018.11.006.

Noormets, A.; McNulty, S. G.; DeForest, J. L.; Sun, G.; Li, Q.; Chen, J. (2008): Drought during canopy development has lasting effect on annual carbon balance in a deciduous temperate forest. In: The New Phytologist 179 (3), pp. 818–828. DOI: 10.1111/j.1469-8137.2008.02501.x.

NUMIS - Das niedersächsische Umweltportal (2005): Bodenübersichtskarte 1:200.000 (BÜK200) - CC8710 Freiburg-Süd NUMIS - Das niedersächsische Umweltportal (ed.). Online available at https://numis.niedersachsen.de/trefferanzeige?docuuid=30D5582D-EC75-4B13-8D77-9053CEDD3C6F, last accessed on 30 Sep 2025.

Puumalainen, J. (2001): Structural, Compositional and Functional Aspects of Forest Biodiversity in Europe. EUR 19904 EN. OPOCE; 2001. JRC21887. Online available at <https://publications.jrc.ec.europa.eu/repository/handle/JRC21887>, last accessed on 30 Sep 2025

Sakschewski, B.; Bloh, W. von; Boit, A.; Rammig, A.; Kattge, J.; Poorter, L.; Peñuelas, J.; Thonicke, K. (2015): Leaf and stem economics spectra drive diversity of functional plant traits in a dynamic global vegetation model. In: Global Change Biology 21 (7), pp. 2711–2725. DOI: 10.1111/gcb.12870.

Scheiter, S.; Higgins, S. I. (2009): Impacts of climate change on the vegetation of Africa: an adaptive dynamic vegetation modelling approach. In: Global Change Biology 15 (9), pp. 2224–2246. DOI: 10.1111/j.1365-2486.2008.01838.x.

Scheiter, S.; Langan, L.; Higgins, S. I. (2013): Next-generation dynamic global vegetation models: learning from community ecology. In: The New Phytologist 198 (3), pp. 957–969. DOI: 10.1111/nph.12210.

Sterck, F.; Vos, M.; Hannula, S. E.; Goede, S. de; Vries, W. de; Ouden, J. den; Nabuurs, G.-J.; van der Putten, W.; Veen, C. (2021): Optimizing stand density for climate-smart forestry: A way forward towards resilient forests with enhanced carbon storage under extreme climate events. In: Soil Biology and Biochemistry 162, p. 108396. DOI: 10.1016/j.soilbio.2021.108396.

Toraño Caicoya, A.; Pretzsch, H. (2021): Stand density biases the estimation of the site index especially on dry sites. In: Canadian Journal of Forest Research 51 (7), pp. 1050–1064. DOI: 10.1139/cjfr-2020-0389.

Vicente-Serrano, S. M.; Beguería, S.; López-Moreno, J. I. (2010): A multiscalar drought index sensitive to global warming: the standardized precipitation evapotranspiration index. In: Journal of Climate 23 (7), pp. 1696–1718. DOI: 10.1175/2009JCLI2909.1.

Weigel, R.; Bat-Enerel, B.; Dulamsuren, C.; Muffler, L.; Weithmann, G.; Leuschner, C. (2023): Summer drought exposure, stand structure, and soil properties jointly control the growth of European beech along a steep precipitation gradient in northern Germany. In: Global Change Biology 29 (3), pp. 763–779. DOI: 10.1111/gcb.16506.

Zamora-Pereira, J. C.; Yousefpour, R.; Cailleret, M.; Bugmann, H.; Hanewinkel, M. (2021): Magnitude and timing of density reduction are key for the resilience to severe drought in conifer-broadleaf mixed forests in Central Europe. In: Annals of Forest Science 78 (3), pp. 1–28. DOI: 10.1007/s13595-021-01085-w.
